# Supplementary material for: Vertically growing nanowall-like N-doped NiP/NF electrocatalysts for the oxygen evolution reaction
Source: Royal Society of Chemistry journal article supplement (doi:10.1039/d2dt01494g), 2022-01-01
Supplement: d2dt01494g1.pdf [file d2dt01494g1.pdf]

## Electronic Supplementary Information

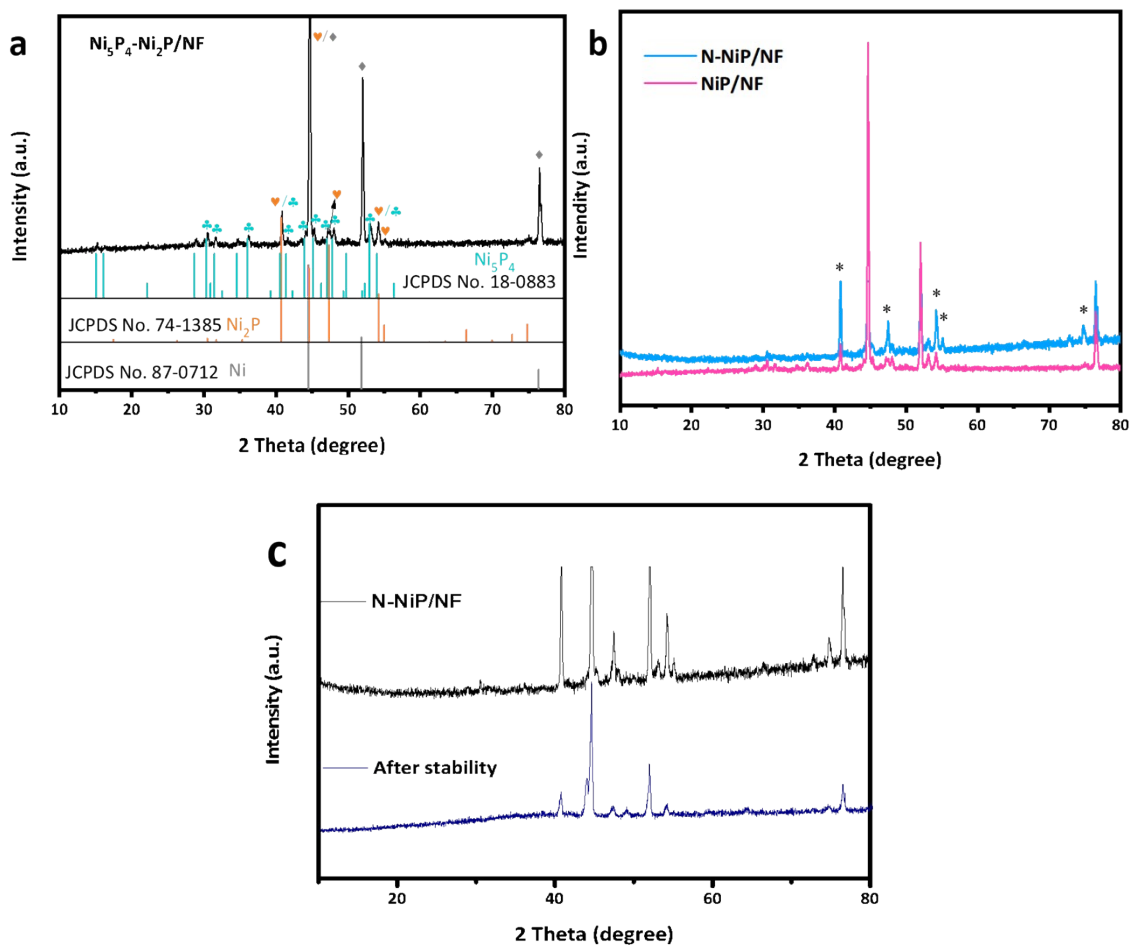

**Fig. S1.** XRD patterns of (a) NiP/NF; (b) XRD comparison of NiP /NF and N-NiP/NF. (c) XRD patterns of N-NiP/NF before and after stability.

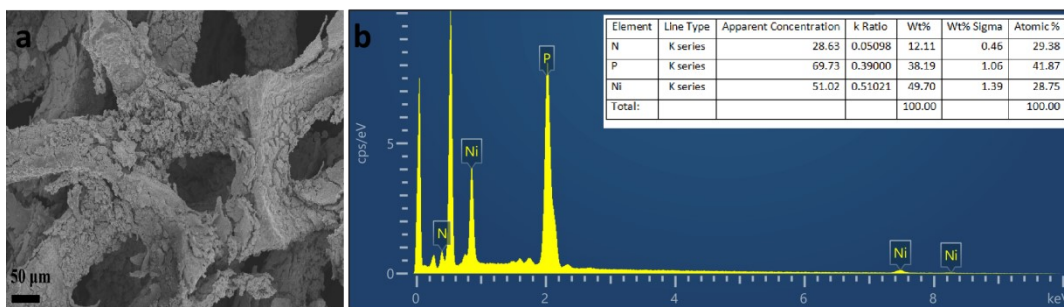

**Fig. S2.** The SEM image at low magnification of N-NiP/NF for a; and EDS spectrum of

N-NiP/NF for b.

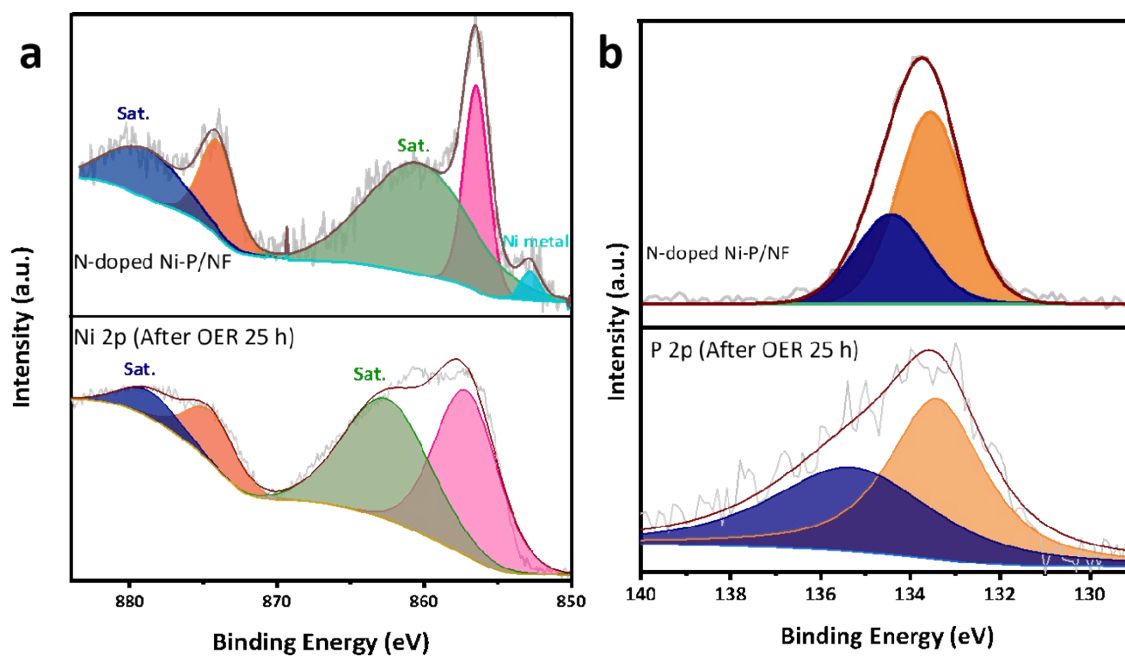

**Fig. S3.** XPS survey spectra of N-NiP/NF in (a) Ni 2p region (b) P 2p region after long-term OER test.

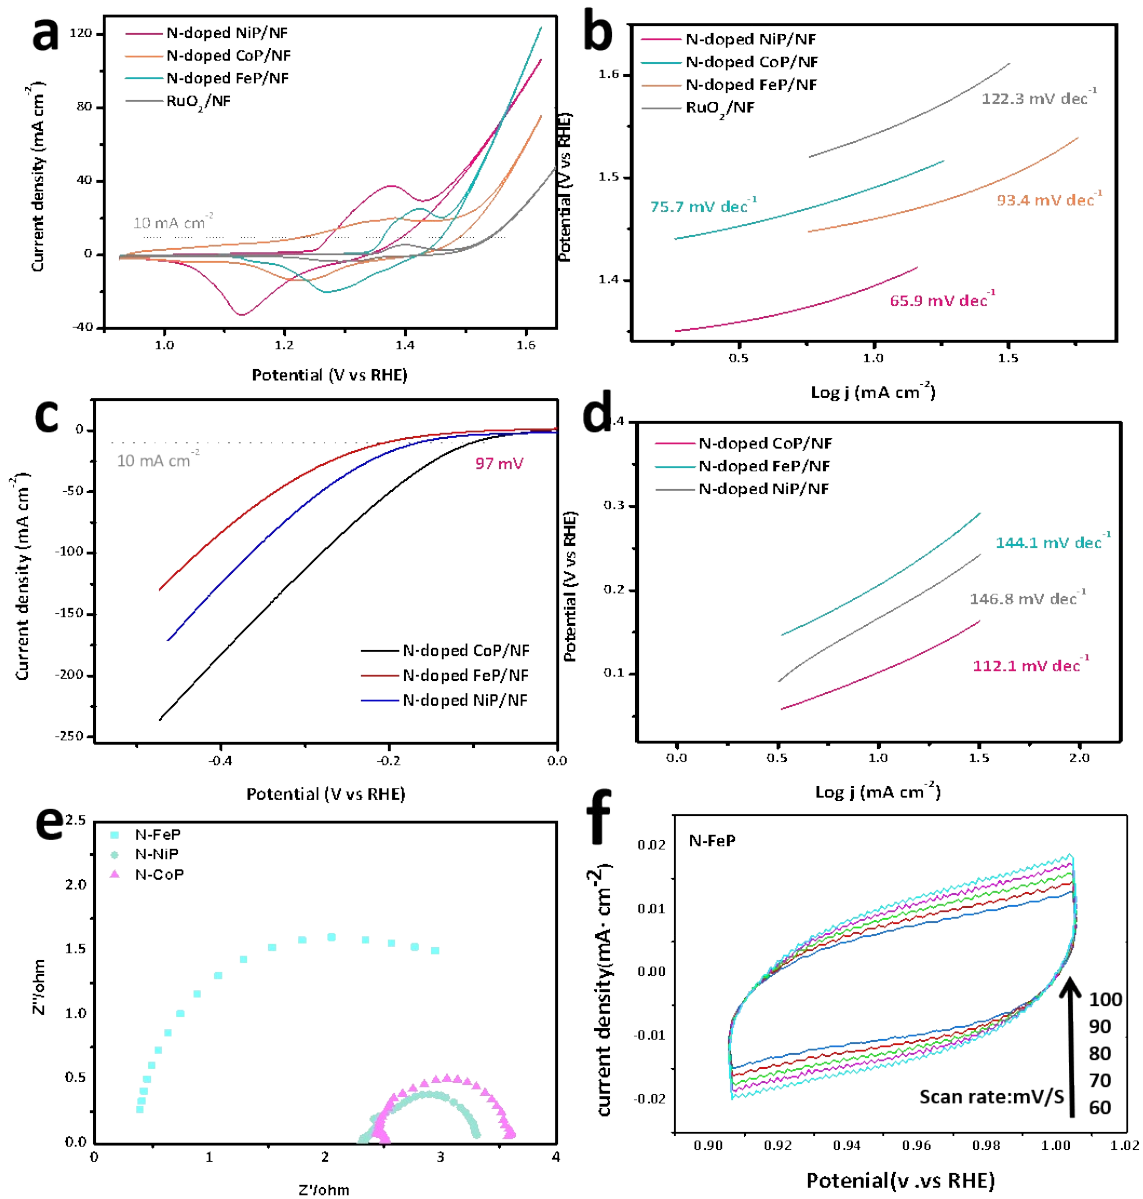

**Fig. S4.** (a) OER polarization curves of N-NiP/NF, N-CoP/NF, N-FeP/NF, RuO<sub>2</sub>/NF. (b) The tafel slope of OER corresponding to different catalysts. (c) HER polarization curves of N-NiP/NF, N-CoP/NF, N-FeP/NF, Pt/NF. (d) The tafel slope of HER corresponding to different catalysts. Nyquist diagram of N-NiP/NF, N-CoP/NF, N-FeP/NF for (e). CV images of N-FeP in the sweep speed range of 60, 70, 80, 90 and 100mV/s for (f).

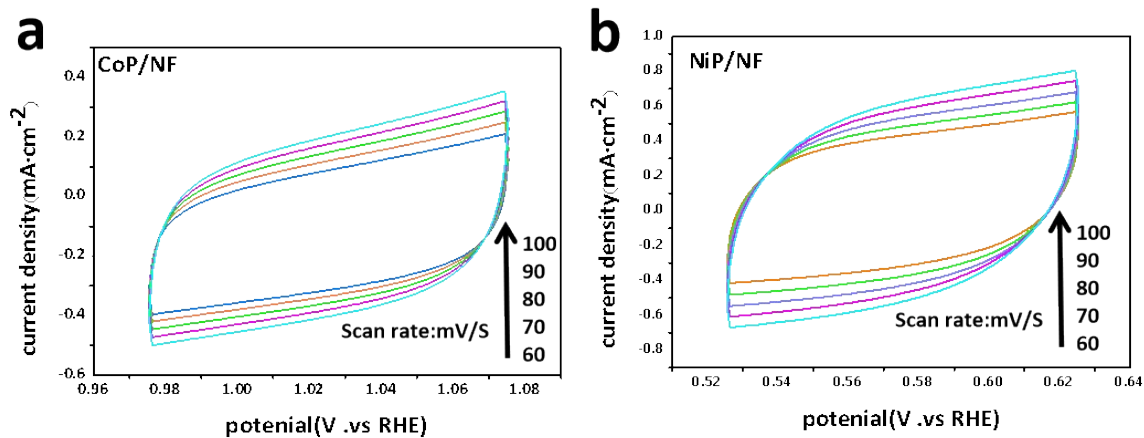

**Fig. S5.** CV images of NiP/NF, CoP/NF in the sweep speed range of 60, 70, 80, 90 and 100mV/s for (a), (b).

**Table S1.** Comparison of the OER performance for N-NiP/NF catalyst with other reported electrocatalysts.

| Catalysts                                                              | $\eta_{10}$ (mV) | Reference |
|------------------------------------------------------------------------|------------------|-----------|
| N - NiP/NF                                                             | 160 mV           | This work |
| V - CoMx (M = P, S, O)                                                 | 290 mV           | 1         |
| Fe - NiP <sub>2</sub> /Ni <sub>2</sub> P                               | 254 mV           | 2         |
| NiFeP@NiP@NF                                                           | 227 mV           | 3         |
| Np - NiFeCoP                                                           | 244 mV           | 4         |
| NiFe LDH/NF-IH                                                         | 246 mV           | 5         |
| Fe- (Ni,Mn)Co <sub>2</sub> O <sub>4</sub>                              | 242 mV           | 6         |
| Co <sub>3</sub> O <sub>4</sub> /CoFe <sub>2</sub> O <sub>4</sub> /NF   | 215 mV           | 7         |
| Ni <sub>3</sub> S <sub>2</sub> @Ni <sub>2</sub> P/MoS <sub>2</sub> /NF | 175 mV           | 8         |
| Ni <sub>0.65</sub> Ga <sub>0.30</sub> Fe <sub>0.05</sub>               | 200 mV           | 9         |
| Ni <sub>3</sub> S <sub>2</sub> - CoMoS <sub>x</sub> /NF                | 234 mV           | 10        |
| Fe <sub>3</sub> O <sub>4</sub> - NiFe LDH NF                           | 216 mV           | 11        |
| VFe-MOF@NF                                                             | 246 mV           | 12        |
| N- CoS <sub>2</sub>                                                    | 240 mV           | 13        |
| triflPt and NiFe-LDH                                                   | 261 mV           | 14        |
| P, B - NiFePB                                                          | 197 mV           | 15        |
| CoSe@NiFe-LDH                                                          | 201 mV           | 16        |

## References

1. C. Wang, H. Xu, Y. Wang, H. Shang, L. Jin, F. Ren, T. Song, J. Guo and Y. K. Du, *Inorg. Chem.*, 2020, 59, 11814-11822.
2. Y. Liu, B. Wang, K. Srinivas, M. Wang, Z. Chen, Z. Su, D. Liu, Y. Li, S. Wang and Y. F. Chen, *Int. J. Hydrogen Energy*, 2022, 47, 12903-12913.
3. F. Diao, W. Huang, G. Ctistis, H. Wackerbarth, Y. Yang, P. Si, J. Zhang, X. Xiao, C. Engelbrekt, *ACS Appl. Mater. Interfaces*, 2021, 13, 23702-23713.
4. Y. Pang, W. Xu, S. Zhu, Z. Cui, Y. Liang, Z. Li, S. Wu, C. Chang and S. Luo, *J. Mater. Sci. Technol.*, 2021, 82, 96-104.
5. G. Xiong, Y. Chen, Z. Zhou, F. Liu, X. Liu, L. Yang, Q. Liu, Y. Sang, H. Liu, X. L. Zhang, J. Jia and W. J. Zhou, *Adv. Funct. Mater.*, 2021, 31, 2009580.
6. H. Shi, Q. Zha and Y. H. Ni, *J. Alloys Compd.*, 2022, 904, 164052.
7. M. Nozari-Asbemarz, M. Amiri, A. Khodayari, A. Bezaatpour, S. Nouhi, P. Hosseini, M. Wark, R. Boukherroub and S. Szunerits, *ACS Appl. Energy Mater.*, 2021, 4, 2951-2959.
8. X. Yu, S. Xu, Z. Wang, S. Wang, J. Zhang, Q. Liu, Y. Luo, Y. Du, X. Sun and Q. Wu, *Dalton Trans.*, 2021, 50, 15094-15102.
9. S. F. Zai, A. Q. Dong, J. Li, Z. Wen, C. C. Yang and Q. Jiang, *J. Mater. Chem. A*, 2021, 9, 6223-6231.
10. L. Zhao, H. Ge, G. Zhang, F. Wang and G. D. Li, *Electrochim. Acta*, 2021, 387, 138538.
11. J. Cen, E. Jiang, Y. Zhu, Z. Chen, P. Tsiakaras and P. K. Shen, *Renew. Energ.*, 2021, 177, 1346-1355.
12. L. Han, J. Xu, Y. Huang, W. Dong and X. L. Jia, *Chin. Chem. Lett.*, 2021, 32, 2263-2268.
13. J. Hao, W. Yang, Z. Peng, C. Zhang, Z. Huang and W. D. Shi, *ACS Catal.*, 2017, 7, 4214-4220.
14. Y. Zhao, Y. Gao, Z. Chen, Z. Li, T. Ma, Z. Wu and L. Wang, *Appl. Catal. B*, 2021, 297, 120395.
15. F. Hu, H. Wang, Y. Zhang, X. Shen, G. Zhang, Y. Pan, J. T. Miller, K. Wang, S. Zhu, X. J. Yang, C. M. Wang, X. J. Wu, Y. J. Xiong and Z. M. Peng, *Small*, 2019, 15, 1901020.
16. H. Sun, J.G. Li, L. Lv, Z. Li, X. Ao, C. Xu, X. Xue, G. Hong and C. D. Wang, *J. Power Sources*, 2019, 425, 138-146.
